# Supplementary material for: Novel mouse monoclonal antibodies specifically recognizing β-(1→3)-D-glucan antigen
Source: PubMed Central journal article supplement (PMC6483564; doi:10.1371/journal.pone.0215535), 2019-04-25

# *Candida tropicalis*

3G11

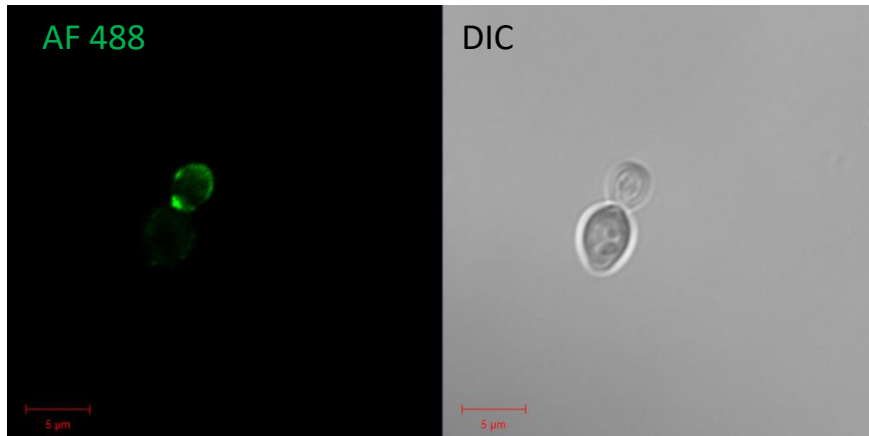

5H5

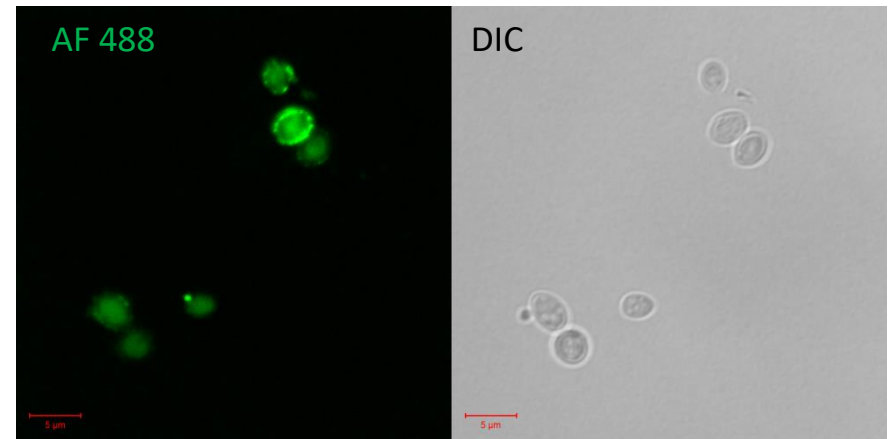

# *Candida parapsilosis*

3G11

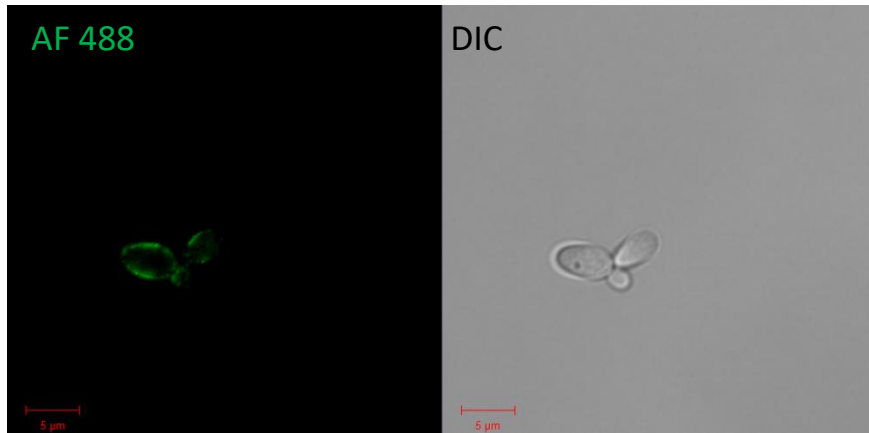

5H5

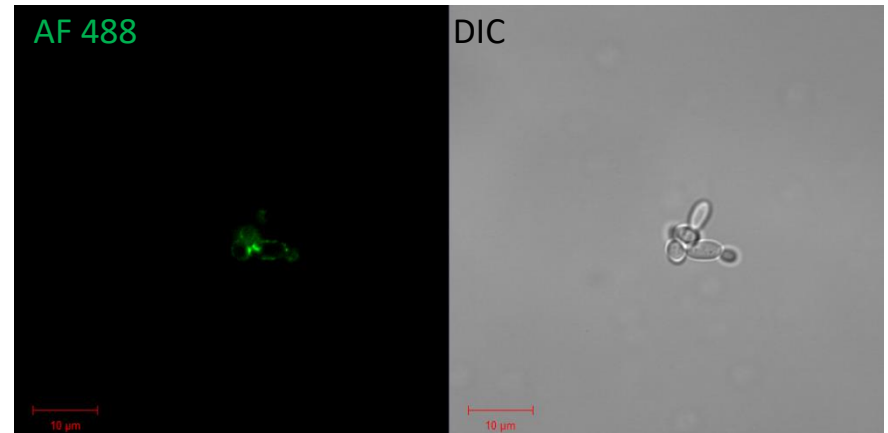

# *Candida dubleniensis*

3G11

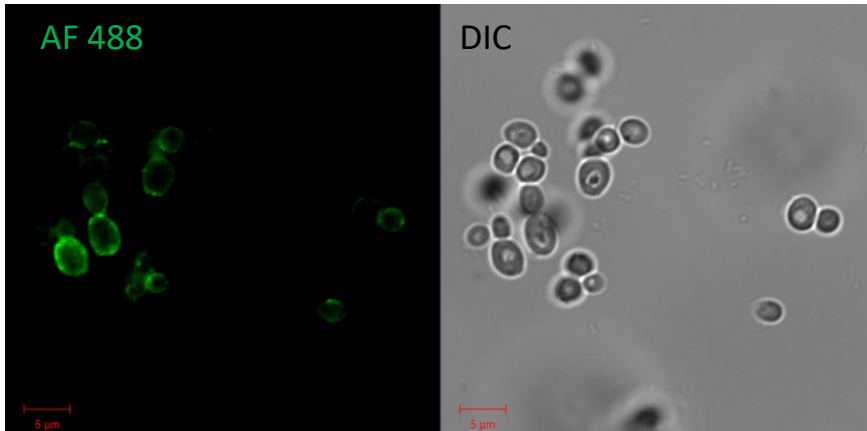

5H5

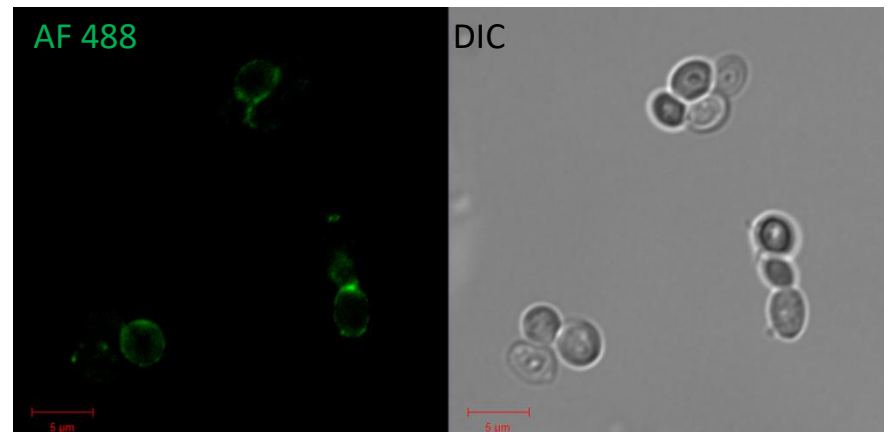

# *Debaryomyces hansenii*

3G11

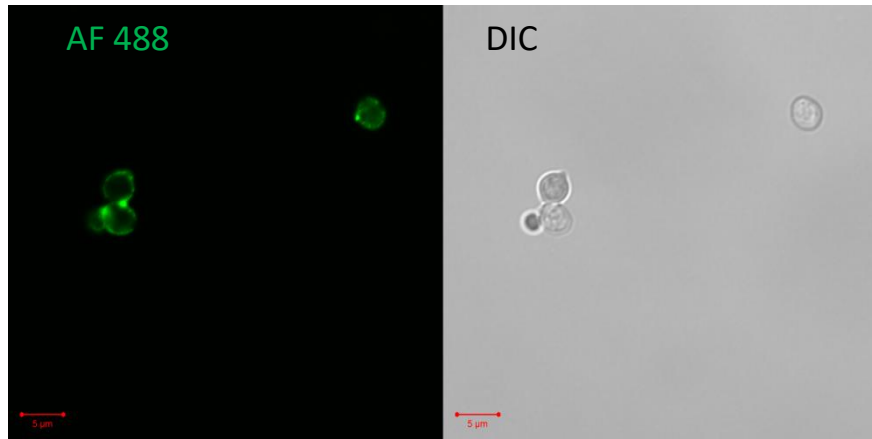

5H5

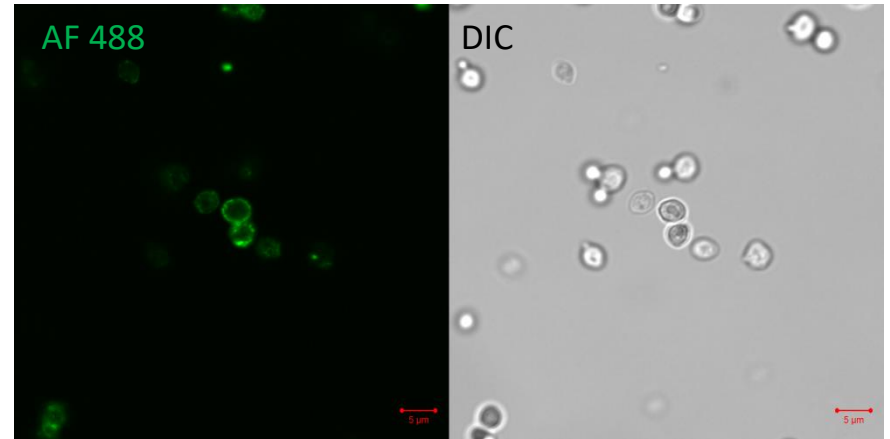

# *Bifidoabterium infantis*

3G11

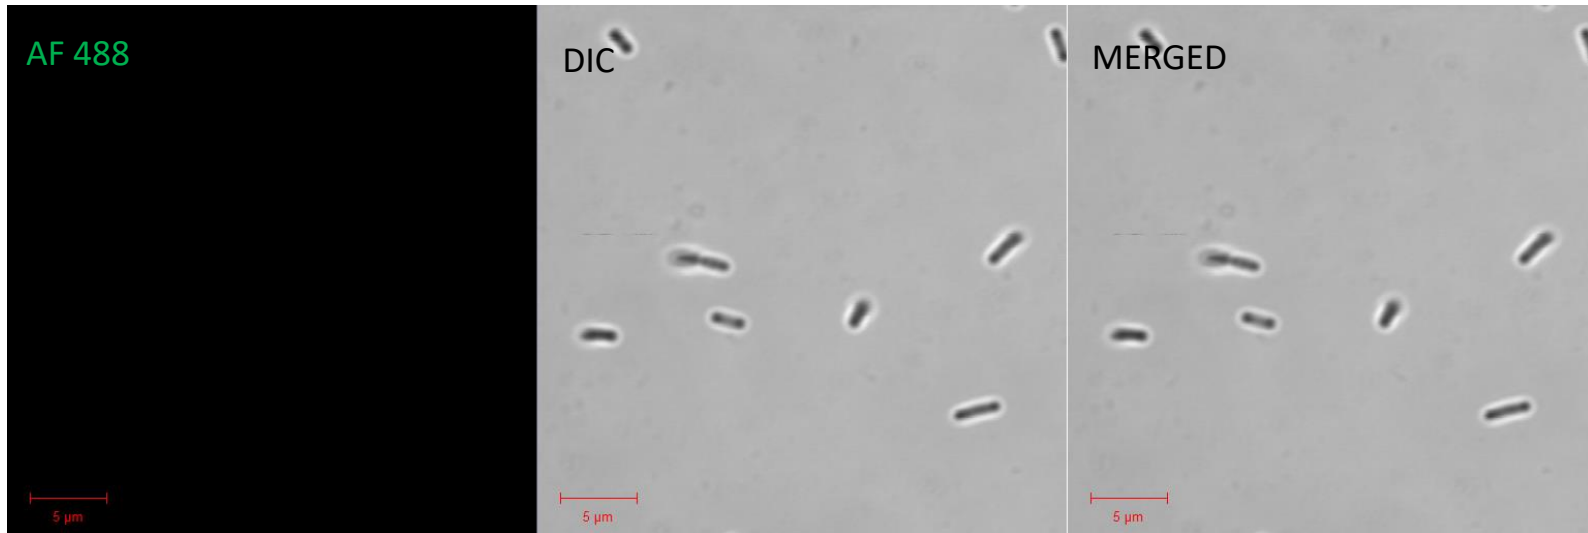

5H5

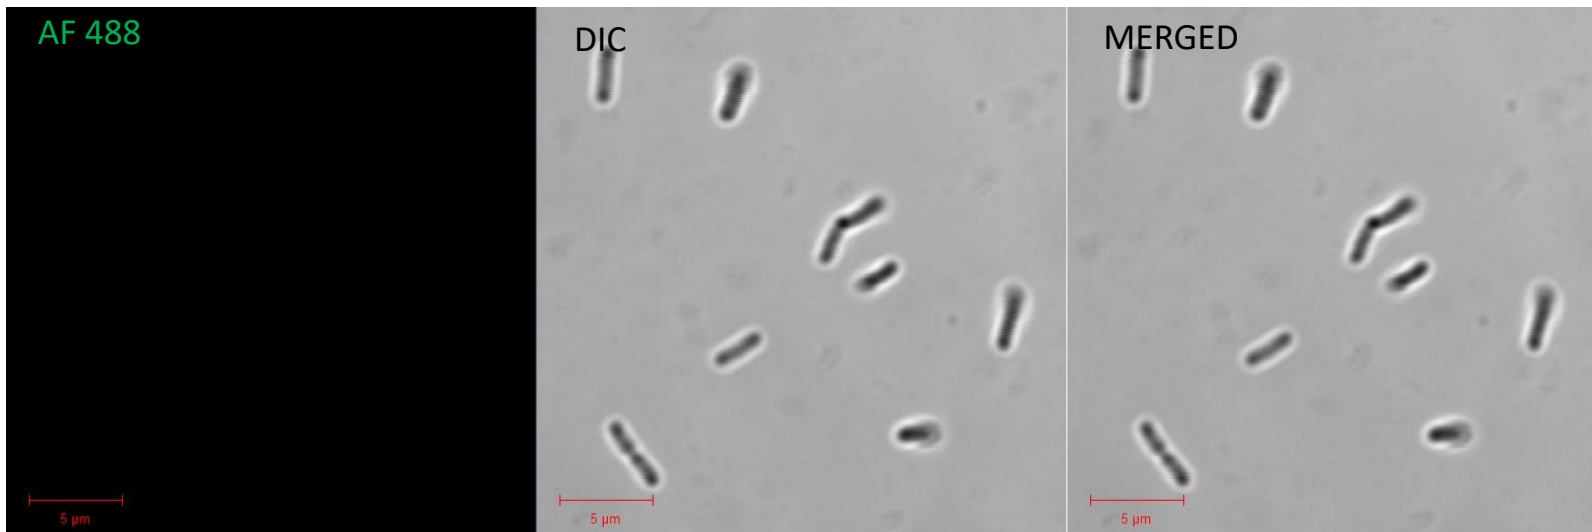

# *Bifidoabterium Longum*

3G11

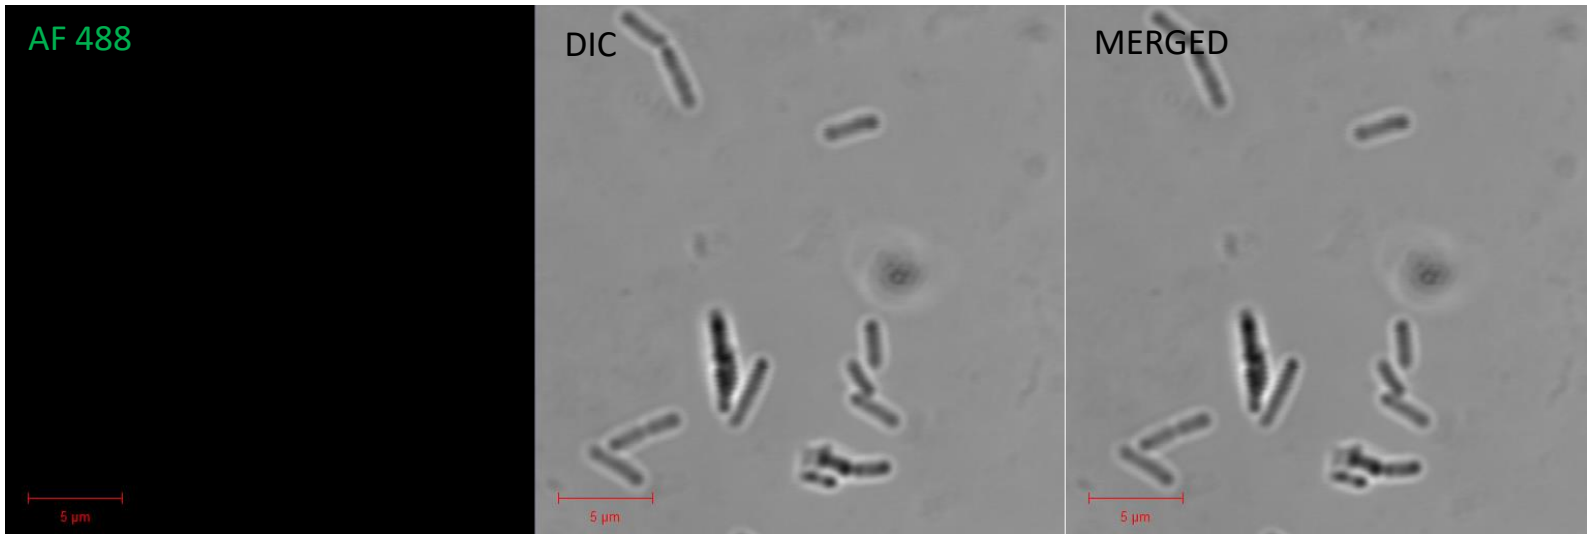

5H5

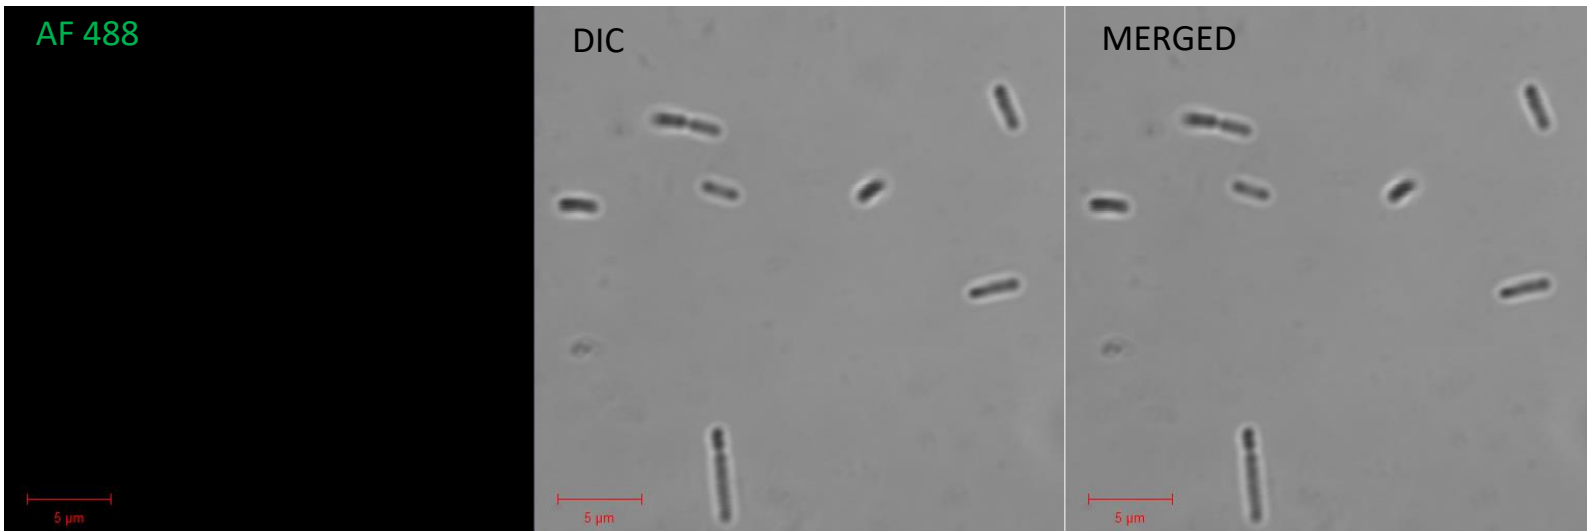

# *Enterococcus faecalis*

3G11

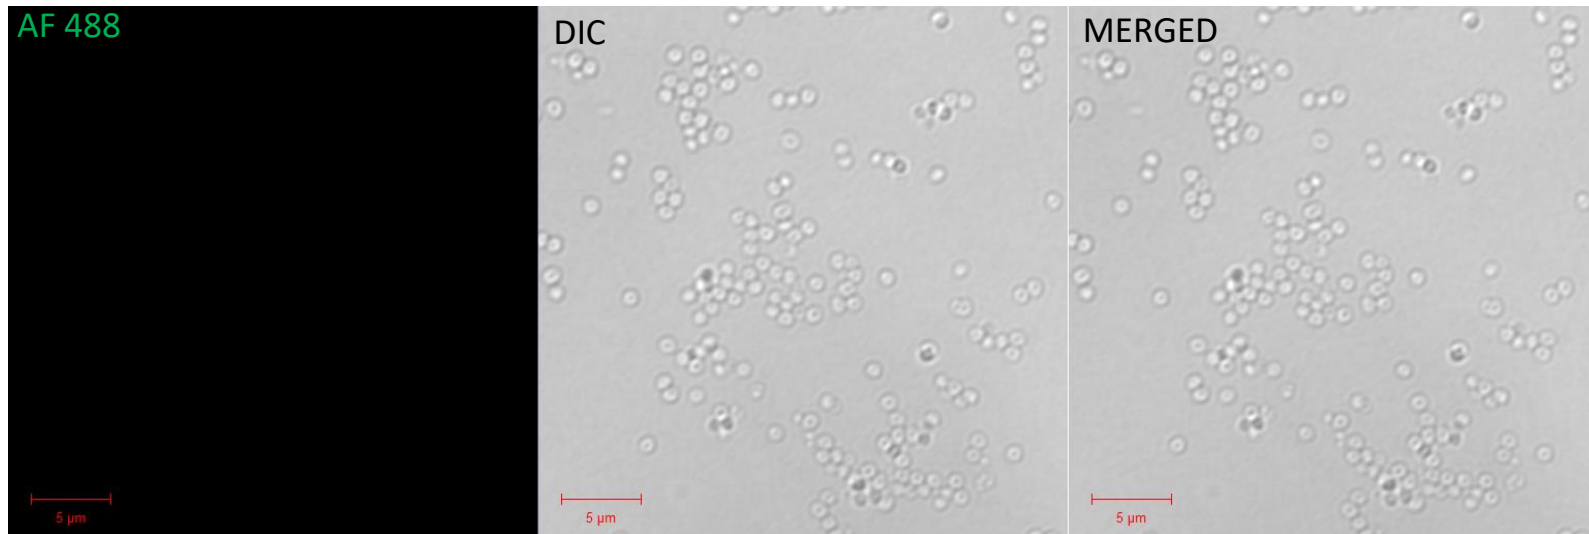

5H5

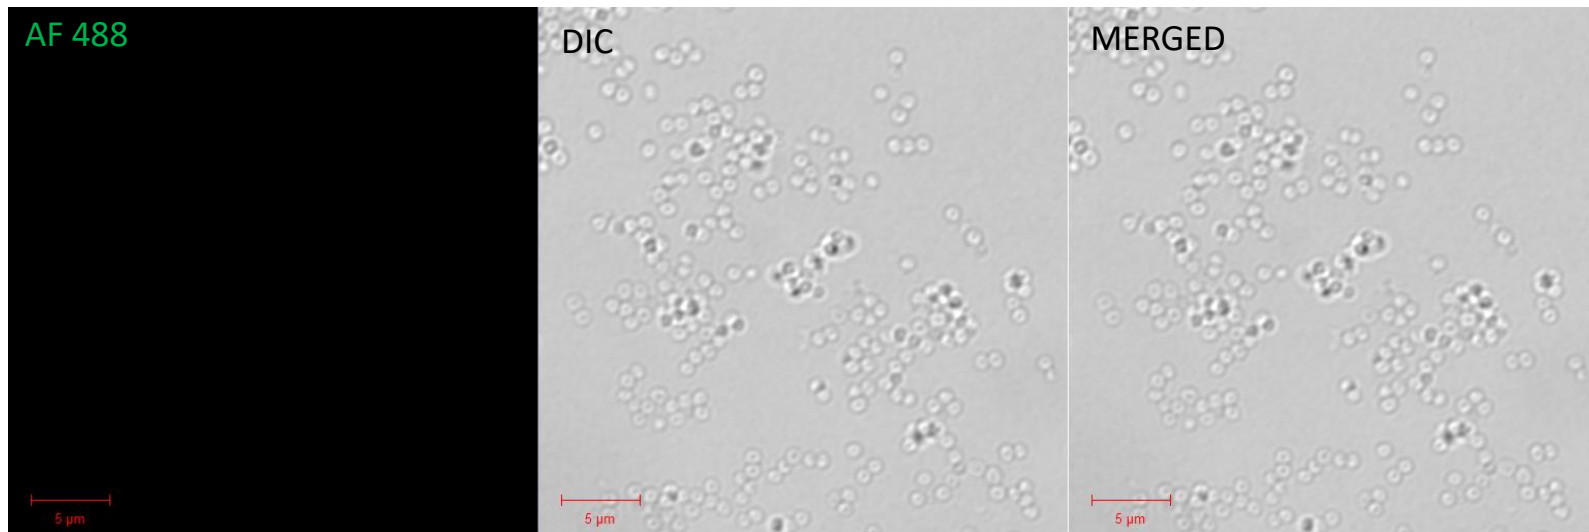

# *Lactobacillus plantarum*

3G11

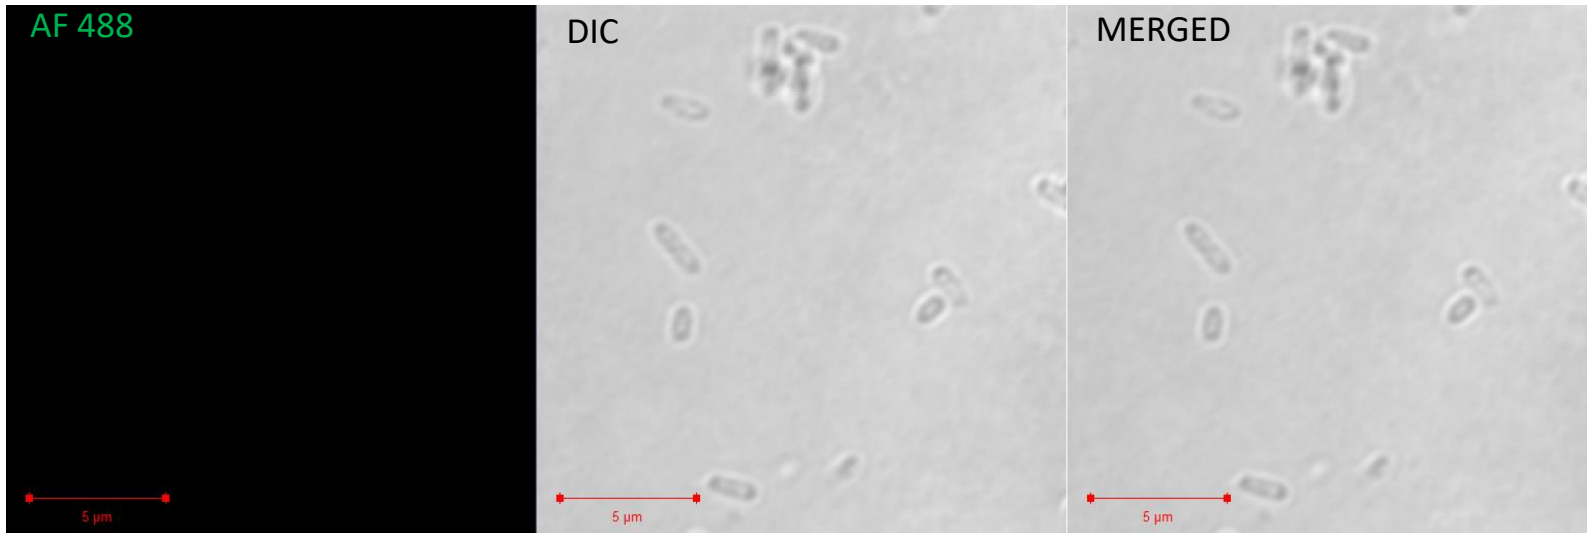

5H5

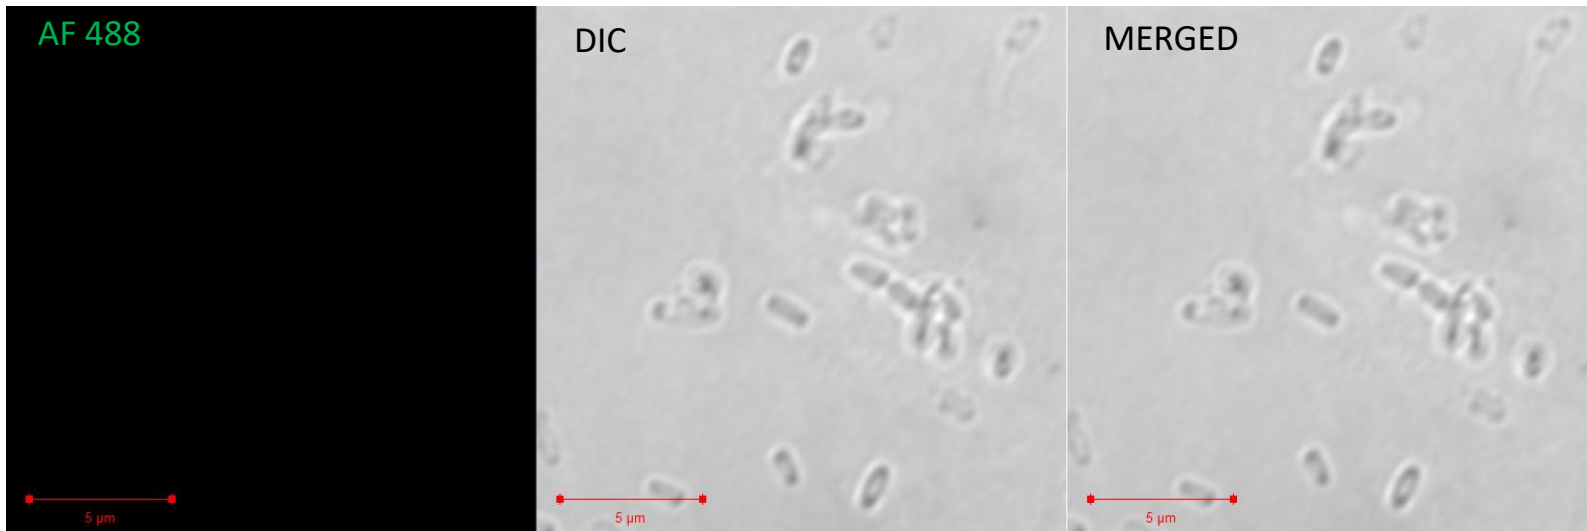



# *Staphylococcus aureus*

3G11

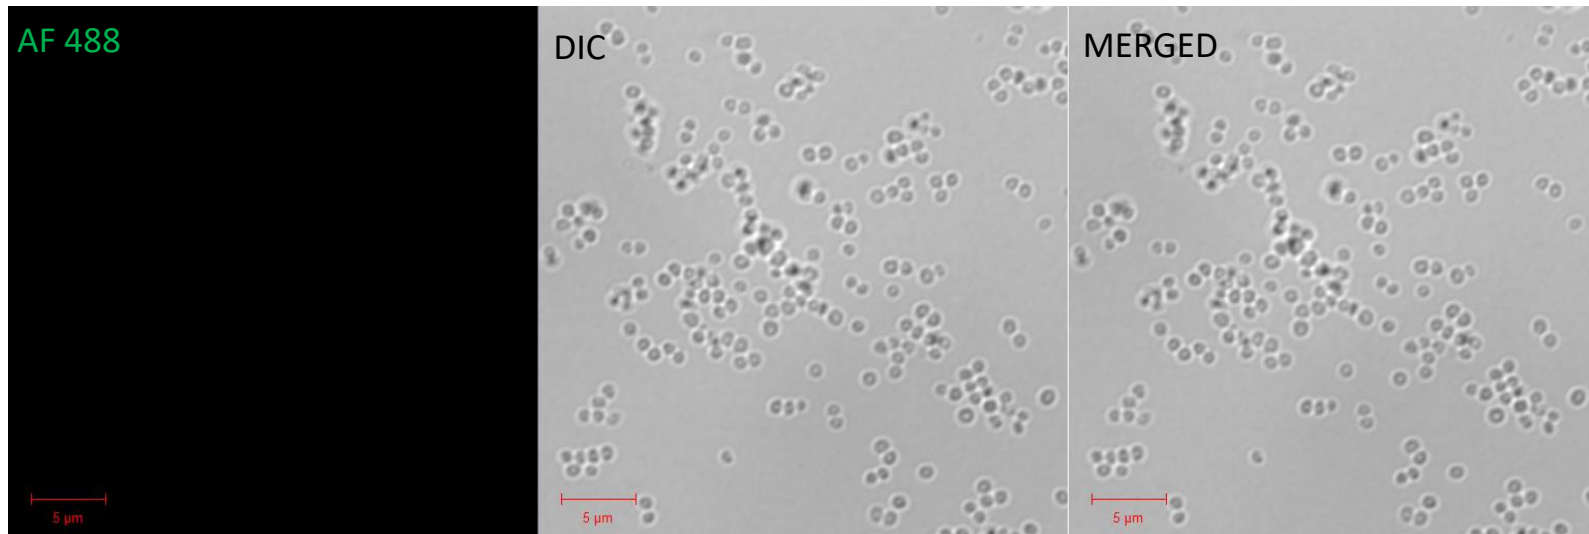

5H5

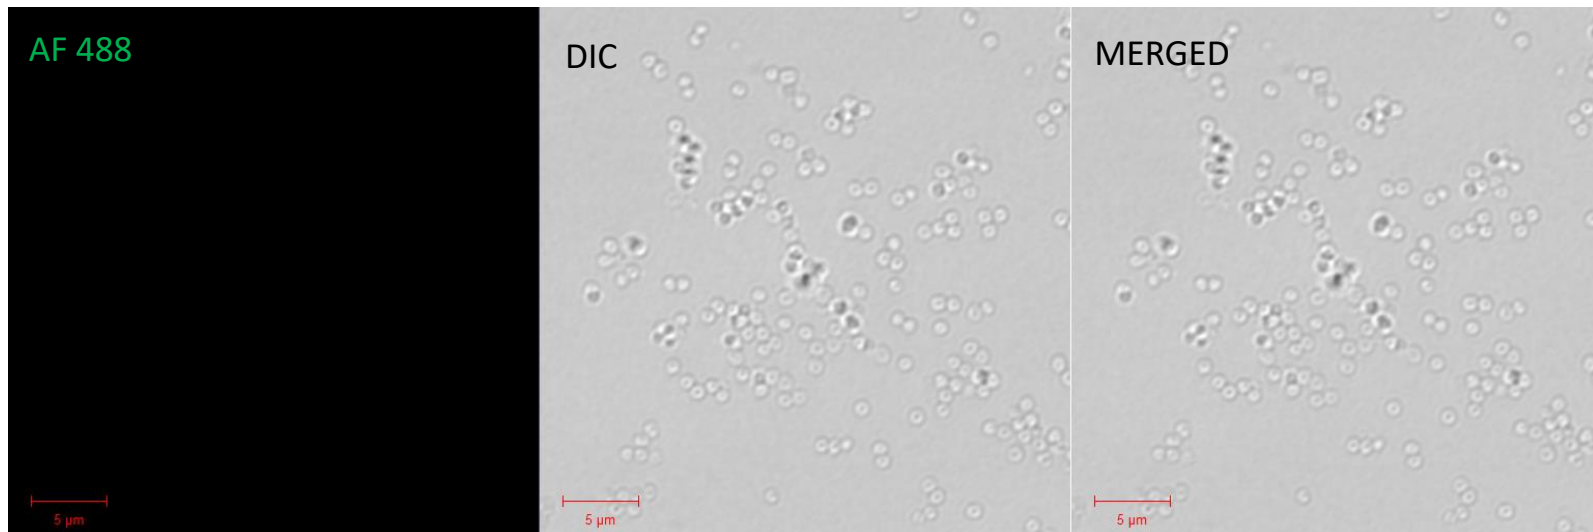

# *Alcaligenes faecalis*

3G11

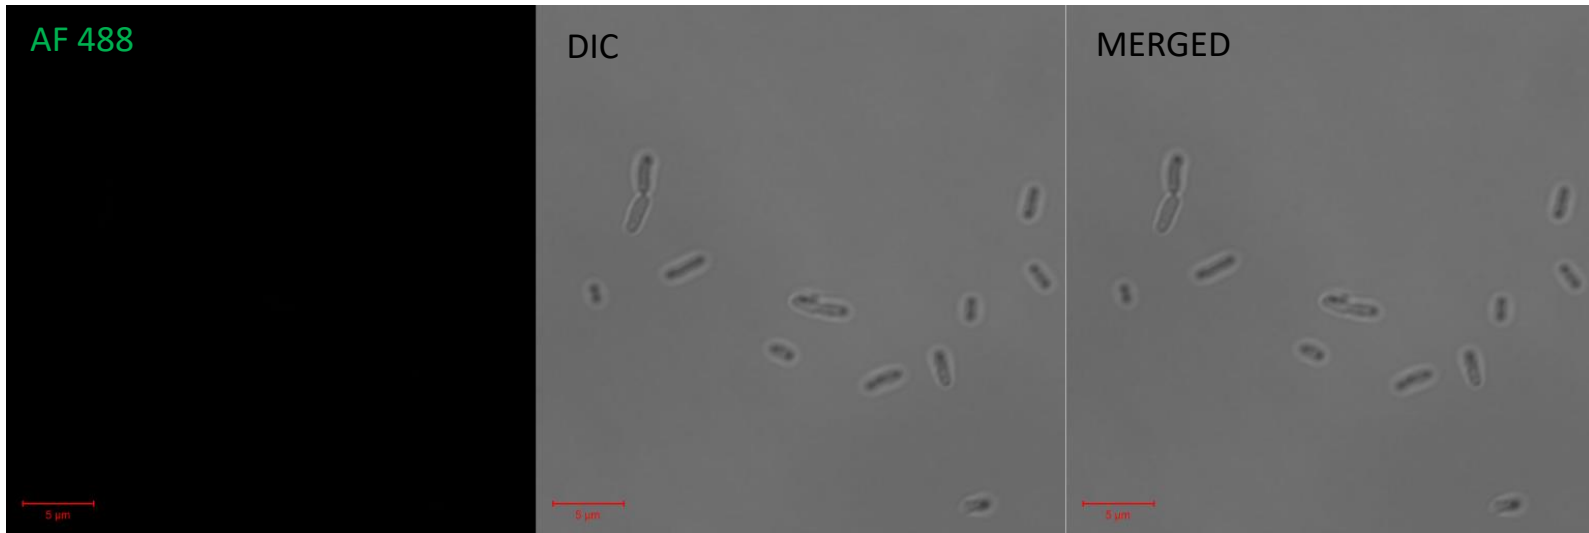

5H5

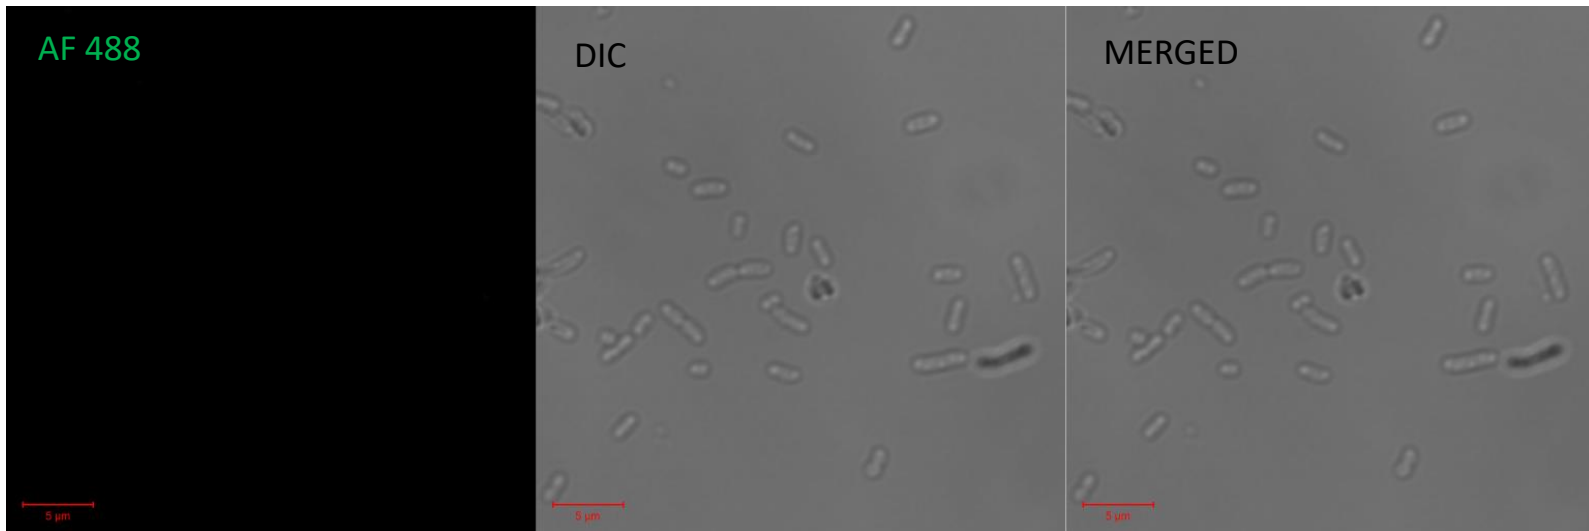

# *Proteus mirabilis*

3G11

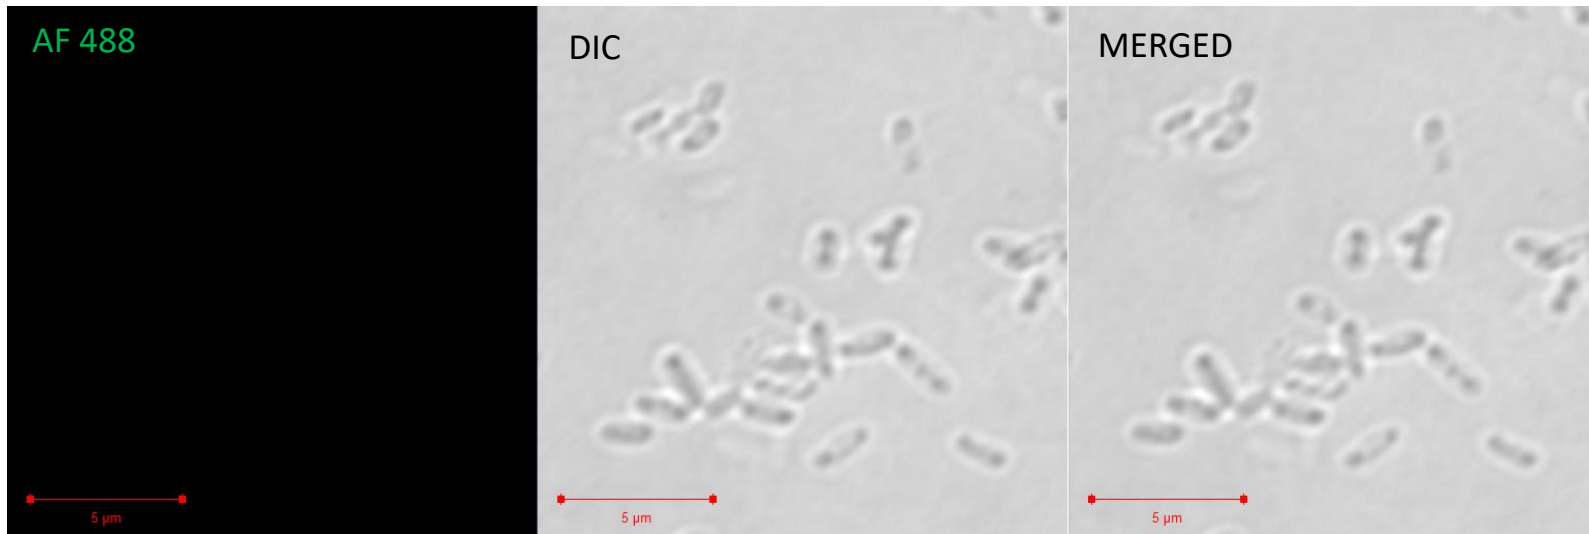

5H5

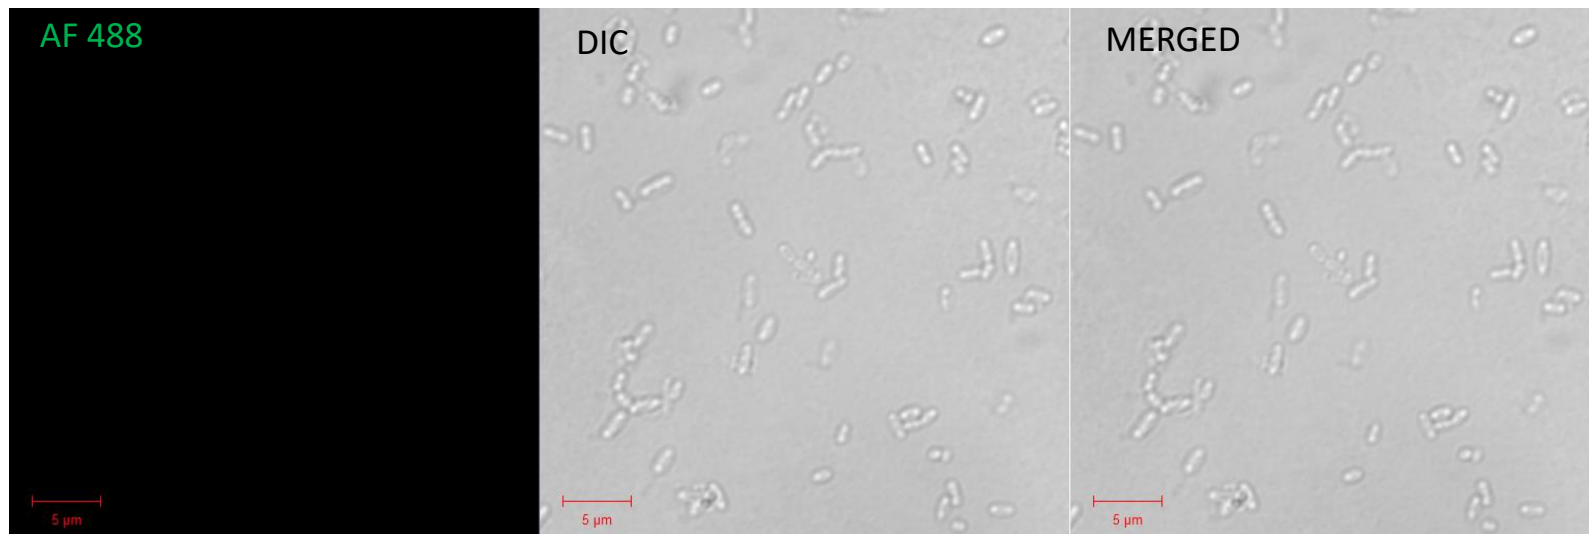

# *Pseudomonas aeruginosa*

3G11

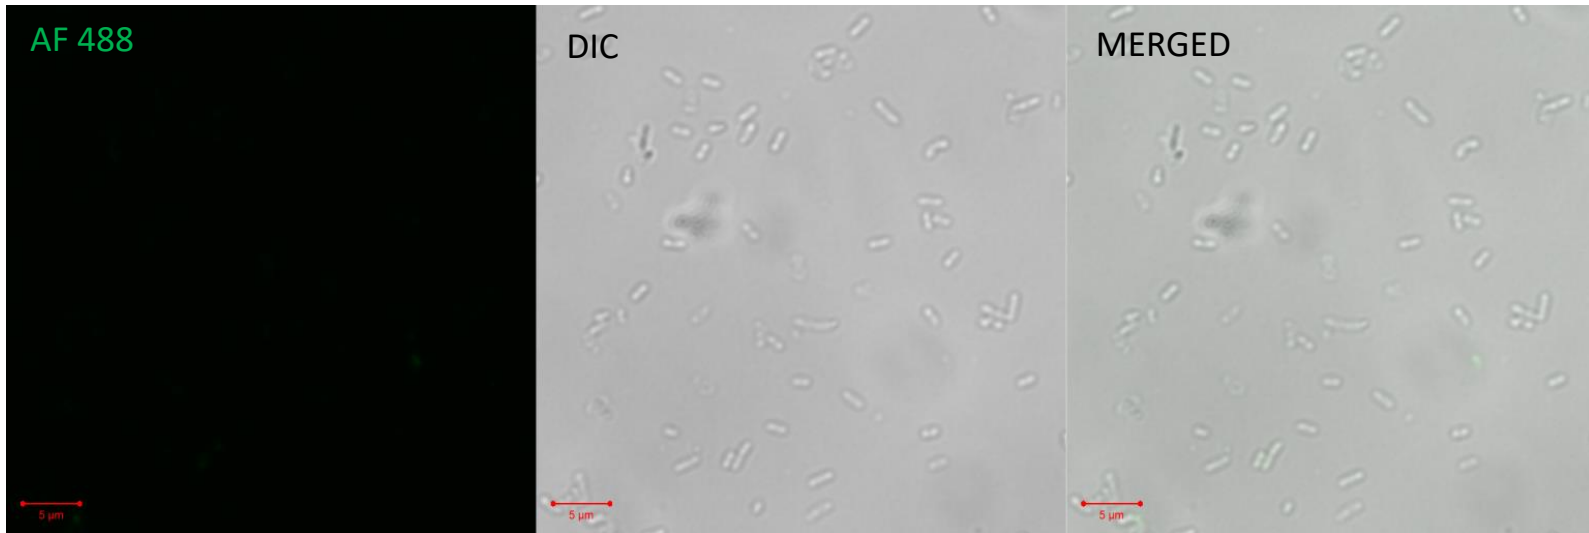

5H5

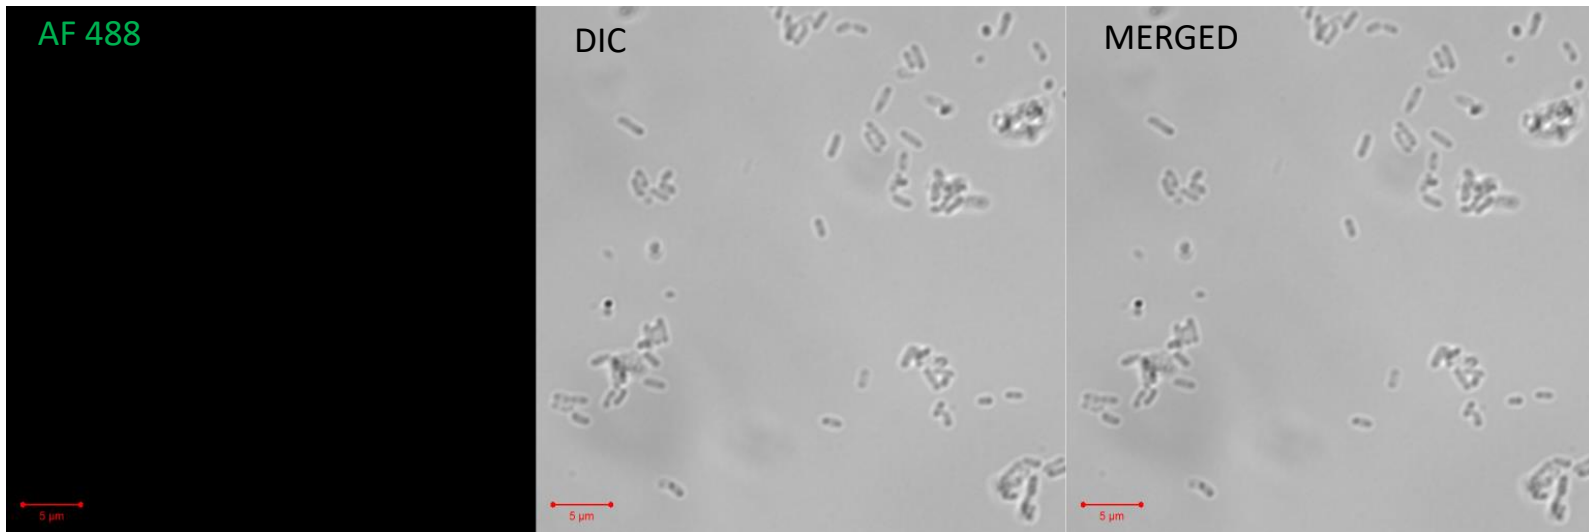

# *Salmonella enterica*

3G11

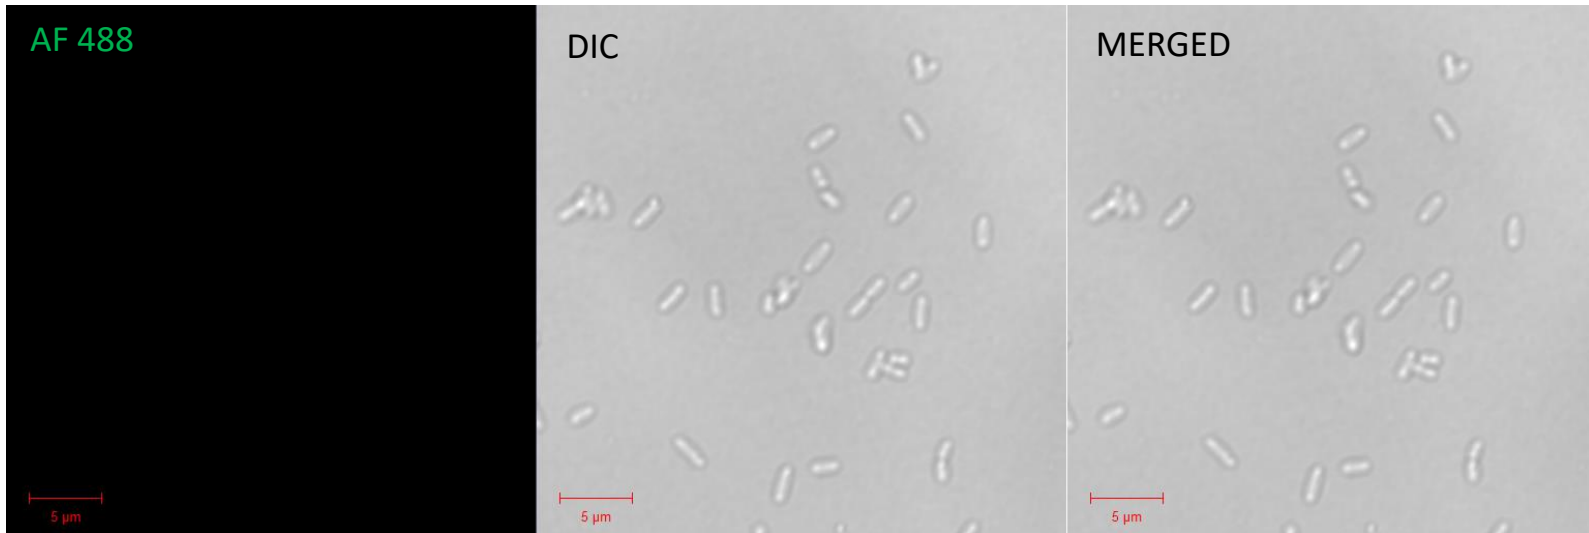

5H5

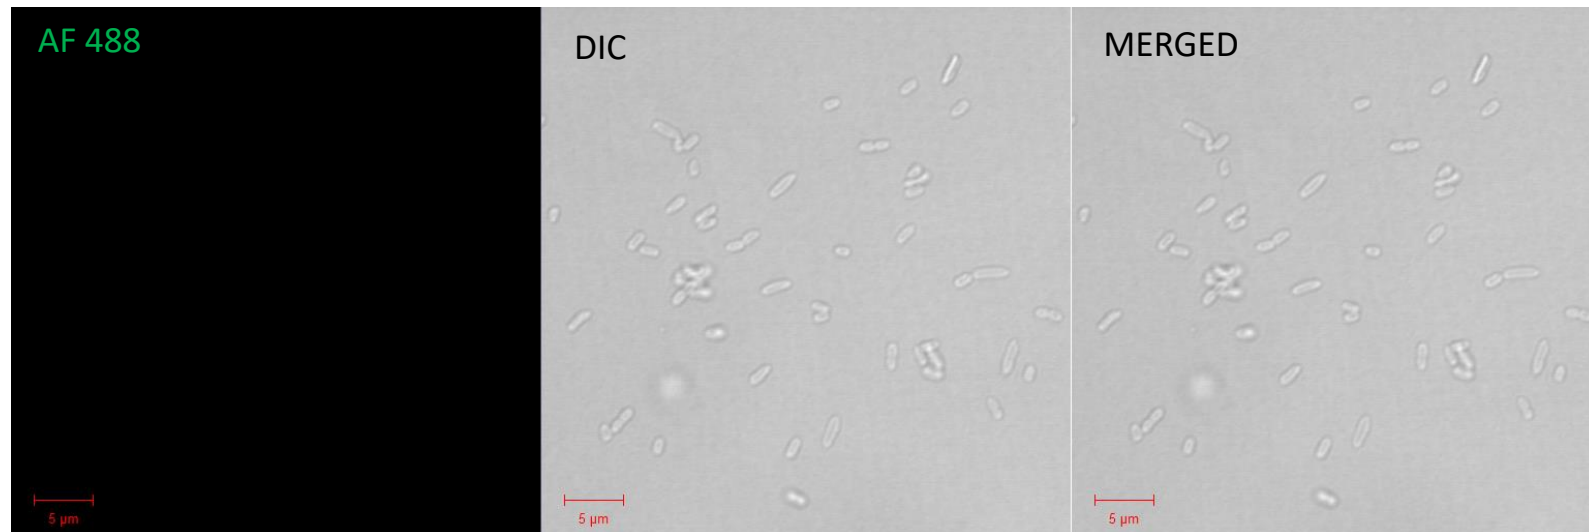

Supplement: pone.0215535.s001.pdf [file pone.0215535.s001.pdf]
