# Supplementary material for: Novel mouse monoclonal antibodies specifically recognizing β-(1→3)-D-glucan antigen
Source: PubMed Central journal article supplement (PMC6483564; doi:10.1371/journal.pone.0215535), 2019-04-25

**A**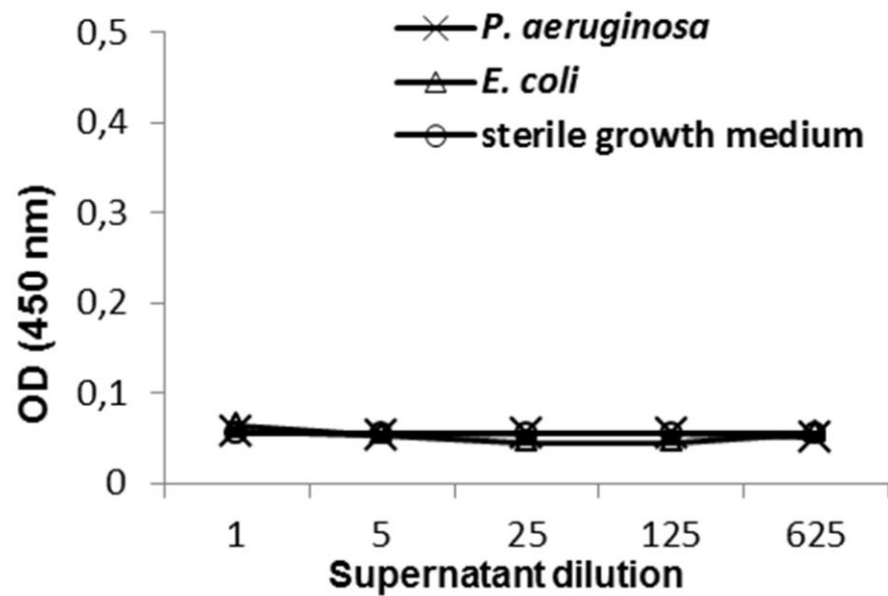**B**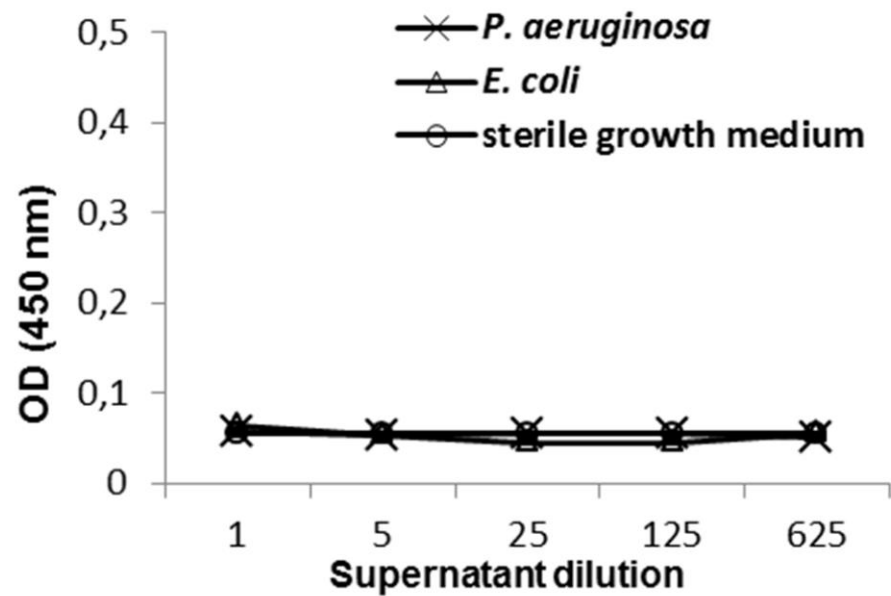

Supplement: pone.0215535.s002.pdf [file pone.0215535.s002.pdf]
